# Supplementary material for: Density functional studies of fused dodecahedral and irregular-dodecahedral water cages
Source: Royal Society of Chemistry journal article supplement (doi:10.1039/c5ra13268a), 2015-01-01
Supplement: c5ra13268a1.pdf [file c5ra13268a1.pdf]

### Supplementary Information

**Supplementary Table 1. The stabilization energy (SE) and stabilization energy per water molecule (SEP) in kcal/mol, for the most stable isomers of fused cages obtained for different functional using cc-pVTZ basis set. The BSSE corrected energy values are given in parentheses.**

| System     | B97-D/cc-pVTZ |          | M06-HF/cc-pVTZ |          | M06-2X/cc-pVTZ |          | M06/cc-pVTZ |         | M06-L/cc-pVTZ |          |
|------------|---------------|----------|----------------|----------|----------------|----------|-------------|---------|---------------|----------|
|            | SE            | SEP      | SE             | SEP      | SE             | SEP      | SE          | SEP     | SE            | SEP      |
| <b>FDD</b> | -452.28       | -12.92   | -447.72        | -12.79   | -437.16        | -12.49   | -411.76     | -11.76  | -407.15       | -11.63   |
|            | (-357.76)     | (-10.22) | (-378.70)      | (-10.82) | (-368.13)      | (-10.52) | (-342.73)   | (-9.79) | (-350.67)     | (-10.02) |
| <b>FDI</b> | -446.98       | -12.77   | -442.14        | -12.63   | -433.08        | -12.37   | -410.86     | -11.73  | -404.43       | -11.55   |
|            | (-353.04)     | (-10.08) | (-366.84)      | (-10.48) | (-364.05)      | (-10.40) | (-335.56)   | (-9.58) | (-341.68)     | (-9.76)  |
| <b>FII</b> | -452.74       | -12.56   | -452.74        | -12.58   | -442.05        | -12.28   | -418.08     | -11.61  | -410.69       | -11.40   |
|            | (-357.88)     | (-9.94)  | (-377.43)      | (-10.48) | (-373.02)      | (-10.36) | (-342.77)   | (-9.52) | (-347.94)     | (-9.66)  |

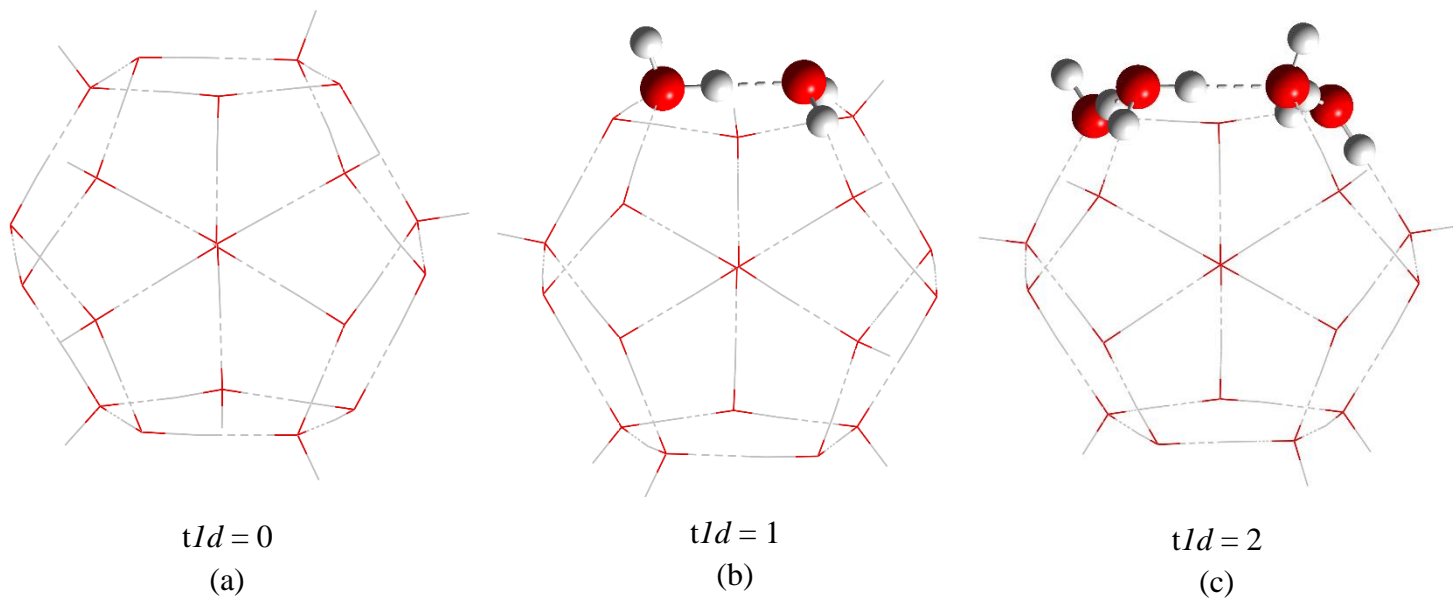

**Supplementary Figure 1. Three different types of five-membered rings present in the dodecahedral water cage each differ in the number of *tld* hydrogen bonds. The *tld* hydrogen bonds are shown using ball and stick model.**

(a)

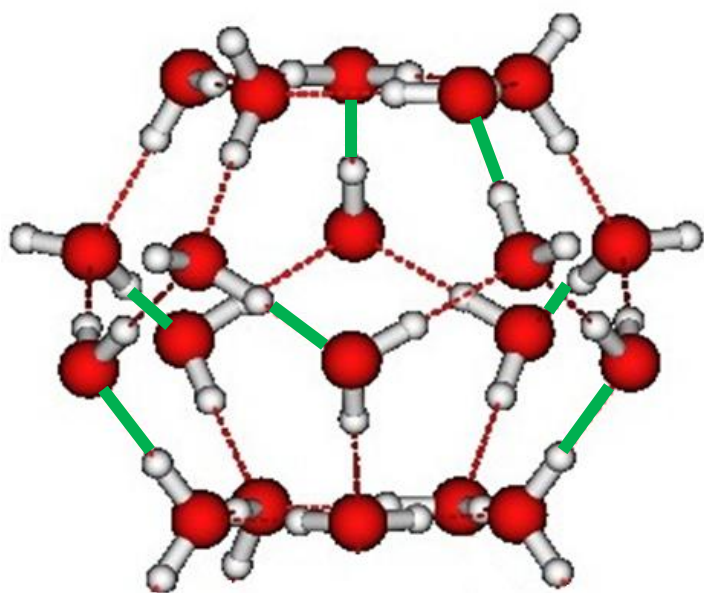

DD (7)

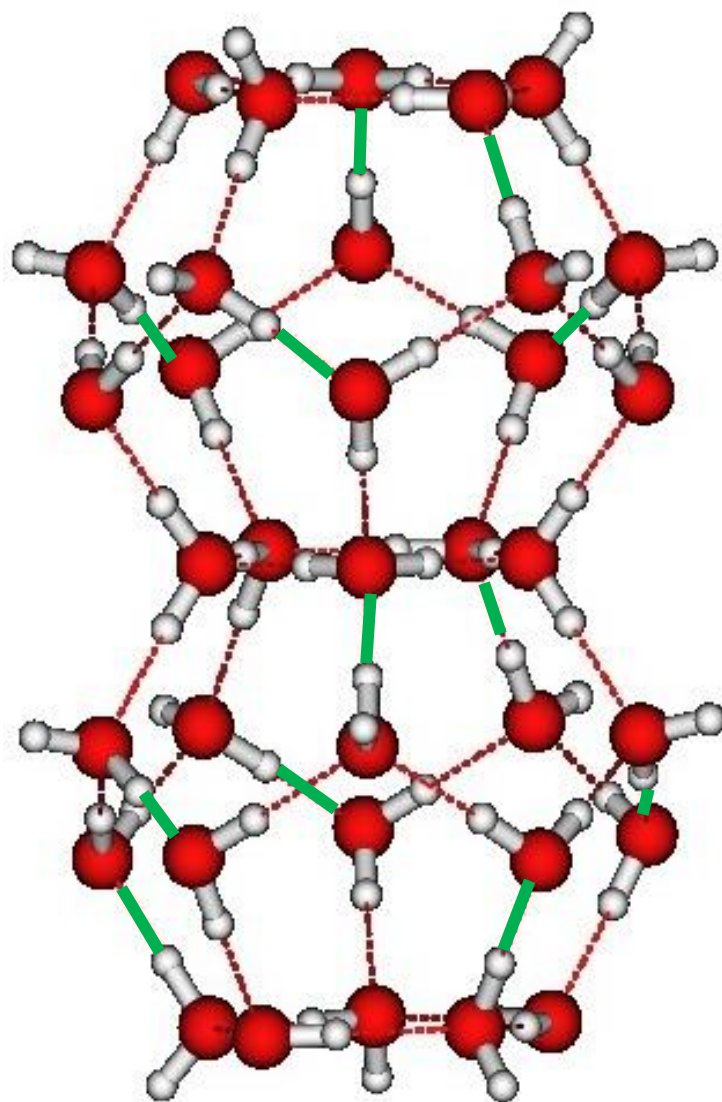

FDD (12)

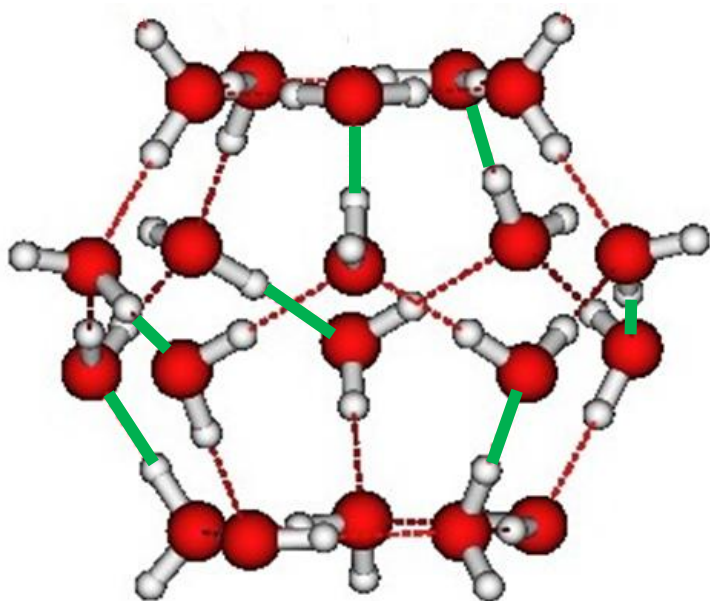

DD (7)

(b)

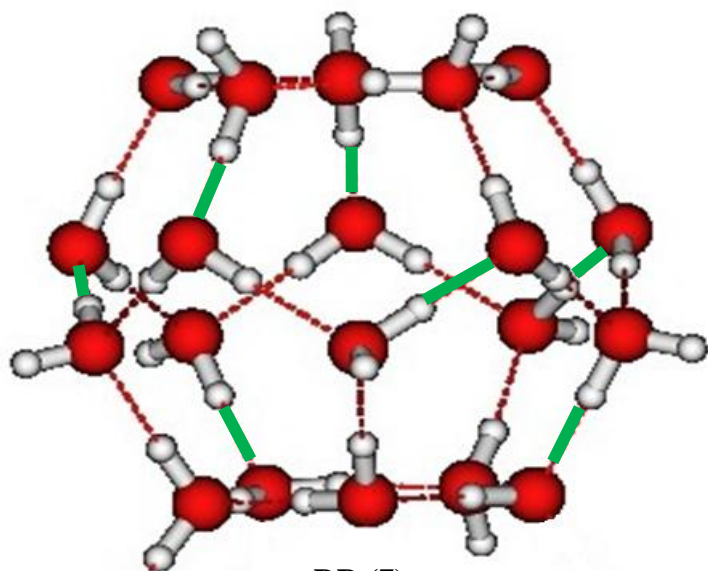

**DD (7)**

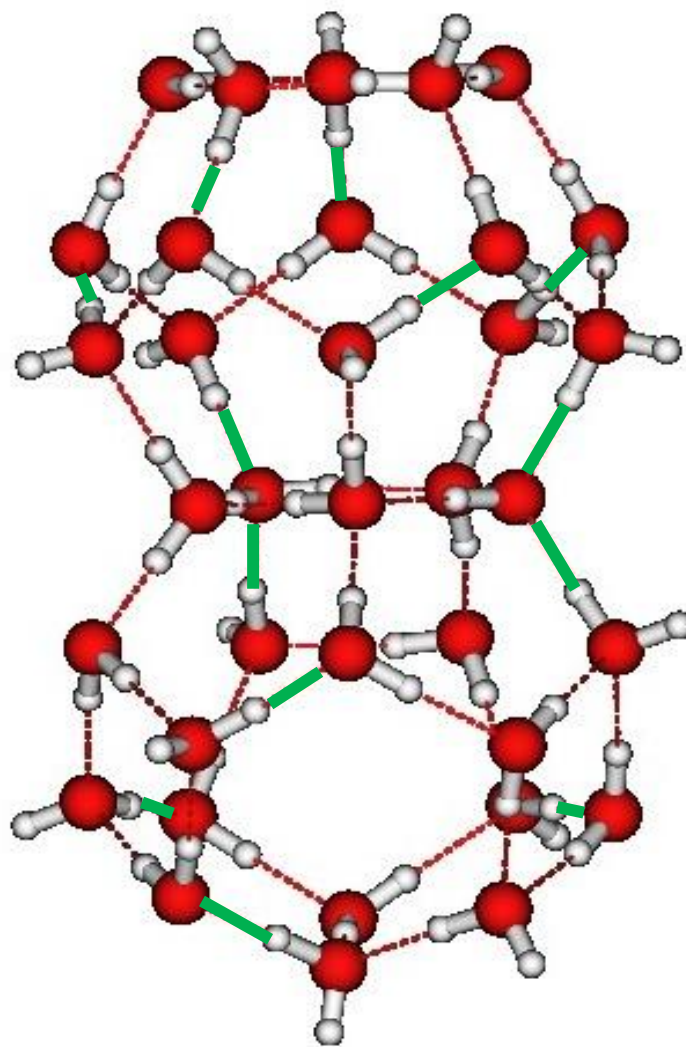

**FDI (13)**

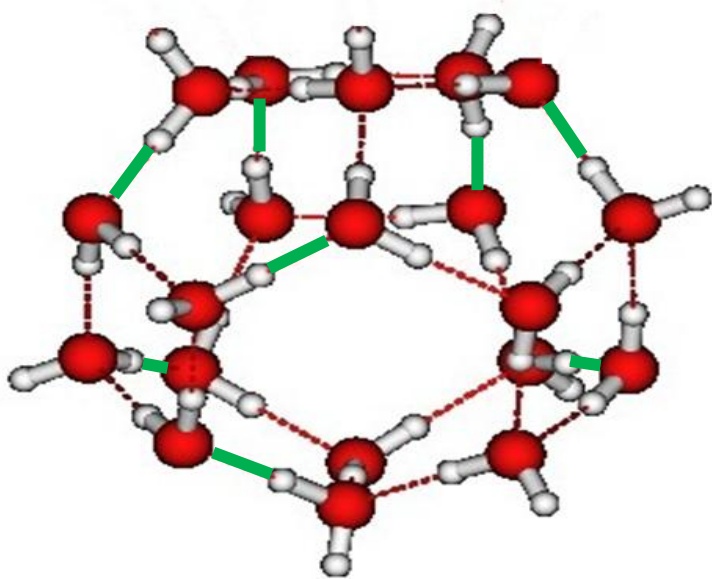

**IDD (8)**

(c)

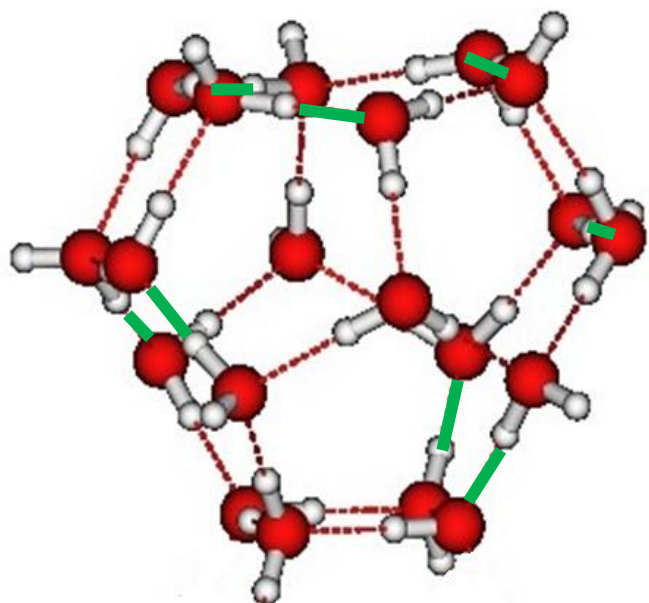

IDD (8)

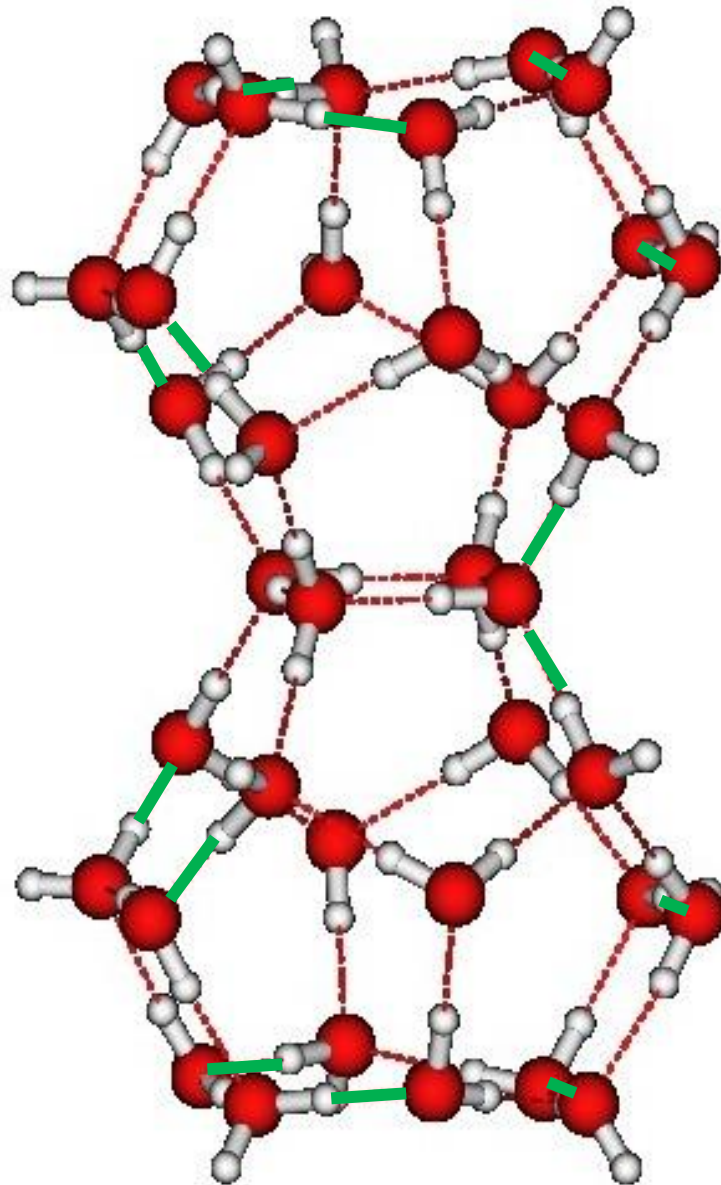

FII (14)

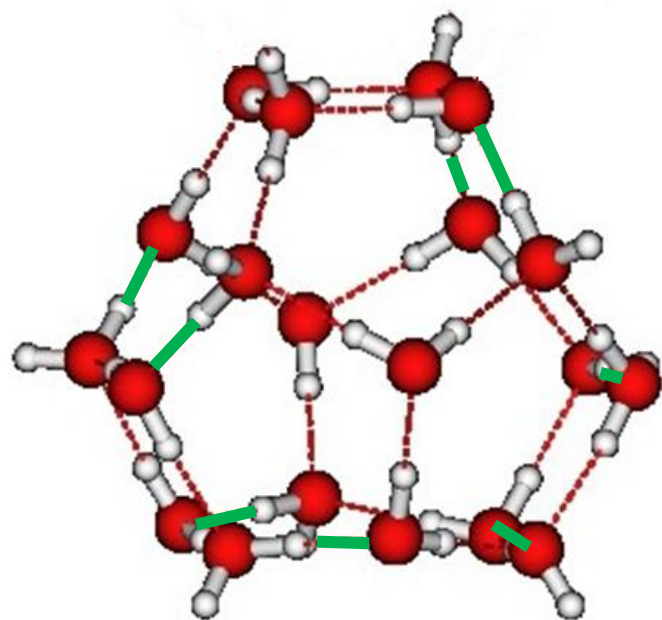

IDD (8)

Supplementary figure 2. The optimized geometries of the single and the fused cages of dodecahedral and irregular dodecahedral water clusters. The number of *t1d* hydrogen bonds in each case is given in parenthesis.

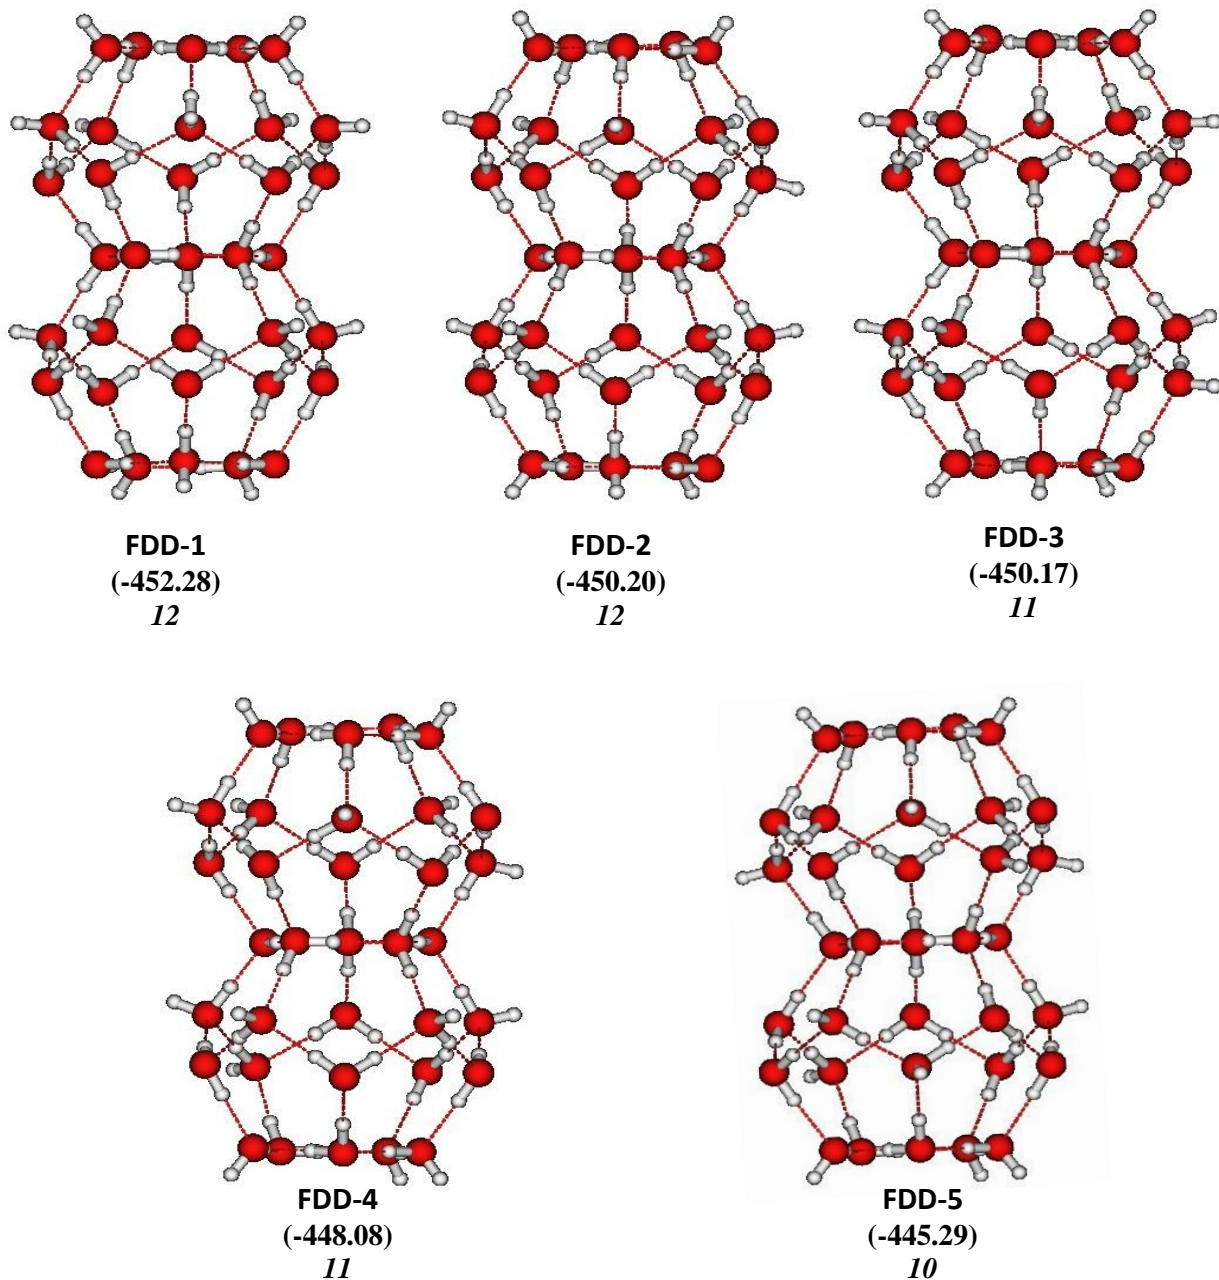

**Supplementary Figure 3.** The optimized geometries of various fused dodecahedral cages (FDD). The stabilization energy without BSSE correction is given in parentheses. The number of t1d hydrogen bonds present in each case is given in italics.

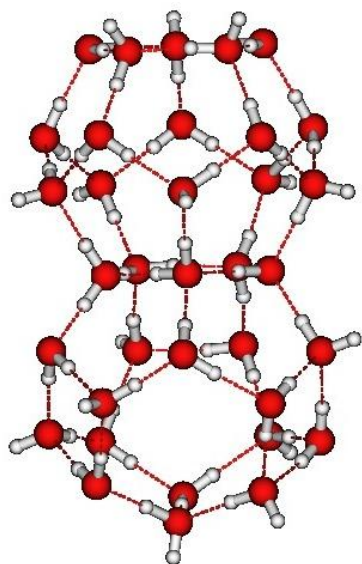

**FDI-1**  
-446.98  
(13)

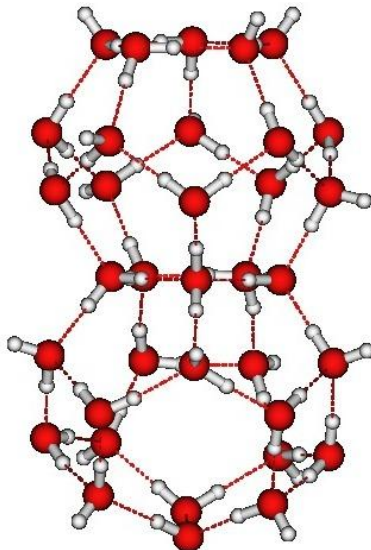

**FDI-2**  
-446.12  
(12)

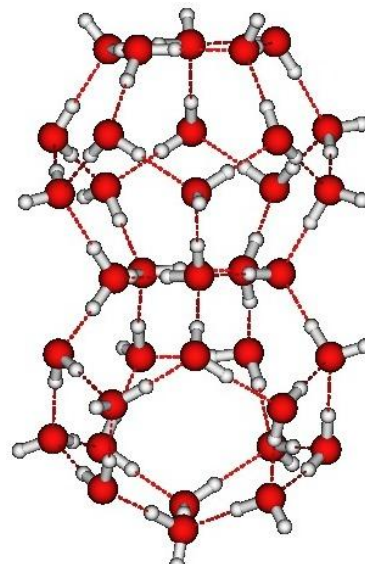

**FDI-3**  
-444.66  
(12)

**Supplementary Figure 4. Same as in figure 3, for the fused dodecahedral irregular dodecahedral (FDI) cages.**

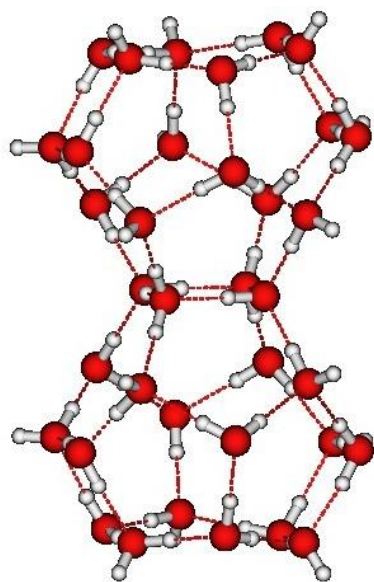

**FII-1**  
-452.74  
(14)

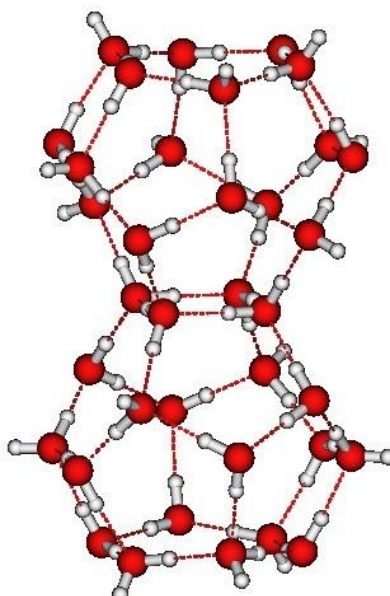

**FII-2**  
-452.58  
(12)

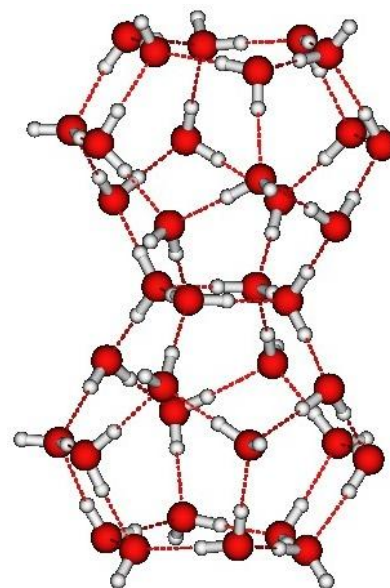

**FII-3**  
-443.16  
(12)

Supplementary Figure 5. Same as in figure 3, for the fused irregular dodecahedral (FII) cages.



Supplementary Table 2. The Bond Parameters for FDD-1 and FDD-2 cages having the same number of t1d hydrogen bonds.

FDD-1

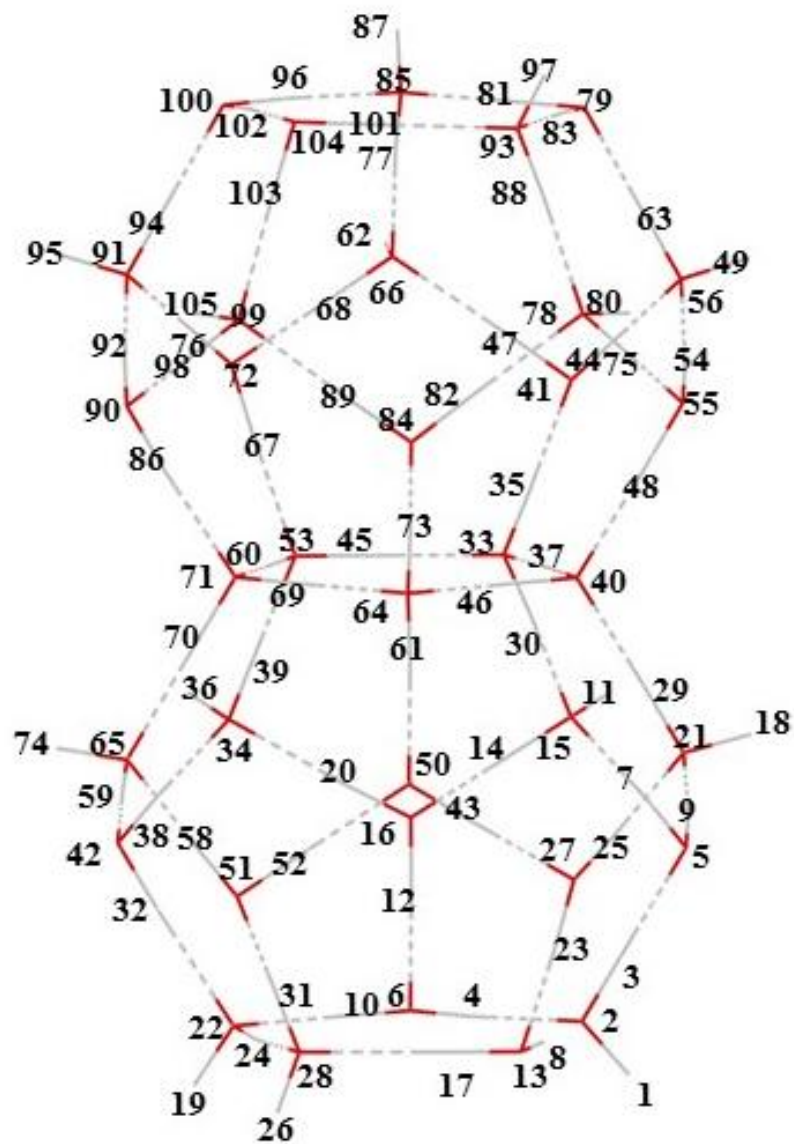

## Cage1:

|           |         |                 |        |              |        |
|-----------|---------|-----------------|--------|--------------|--------|
| O100-H102 | 0.99584 | O100H102...O104 | 1.7154 | O100H102O104 | 177.37 |
| O100-H96  | 0.97598 | O100H96...O85   | 1.8973 | O100H96O85   | 176.28 |
| O104-H101 | 0.97548 | O104H101...O93  | 1.9068 | O104H101O93  | 179.11 |
| O79-H83   | 0.98135 | O79H83...O93    | 1.8187 | O79H83O93    | 177.77 |
| O79-H81   | 0.98125 | O79H81...O85    | 1.8158 | O79H81O85    | 179.15 |
| O90-H92   | 0.9825  | O90H92...O91    | 1.8148 | O90H92O91    | 177.15 |
| O99-H98   | 1.01582 | O99H98...O90    | 1.5976 | O99H98O90    | 179.87 |
| O84-H89   | 0.98367 | O84H89...O99    | 1.8034 | O84H89O99    | 176.86 |
| O84-H82   | 0.97845 | O84H82...O78    | 1.8739 | O84H82O78    | 178    |
| O78-H75   | 1.02438 | O78H75...O55    | 1.5601 | O78H75O55    | 179.4  |
| O55-H54   | 0.9826  | O55H54...O56    | 1.8129 | O55H54O56    | 176.74 |
| O41-H44   | 0.98142 | O41H44...O56    | 1.8329 | O41H44O56    | 176.17 |
| O41-H47   | 0.97944 | O41H47...O66    | 1.8596 | O41H47O66    | 177.79 |
| O66-H68   | 1.02775 | O66H68...O72    | 1.5484 | O66H68O72    | 178.96 |
| O72-H76   | 0.98548 | O72H76...O91    | 1.7863 | O72H76O91    | 179.3  |
| O71-H69   | 0.99546 | O71H69...O64    | 1.699  | O71H69O64    | 177.37 |
| O40-H46   | 0.99672 | O40H46...O64    | 1.6903 | O40H46O64    | 179.67 |
| O40-H37   | 0.99611 | O40H37...O33    | 1.6947 | O40H37O33    | 178.58 |
| O53-H45   | 0.99634 | O53H45...O33    | 1.6951 | O53H45O33    | 179.5  |
| O53-H60   | 0.99597 | O53H60...O71    | 1.7001 | O53H60O71    | 178.93 |

## INTERLAYERED:

|           |         |                |        |             |        |
|-----------|---------|----------------|--------|-------------|--------|
| O93-H88   | 0.99644 | O93H88...O78   | 1.6981 | O93H88O78   | 175.53 |
| O85-H77   | 0.99703 | O85H77...O66   | 1.6936 | O85H77O66   | 174.96 |
| O91-H94   | 1.01911 | O91H94...O100  | 1.5786 | O91H94O100  | 179.41 |
| O104-H103 | 0.98185 | O104H103...O99 | 1.826  | O104H103O99 | 178.74 |
| O56-H63   | 1.0116  | O56H63...O79   | 1.6129 | O56H63O79   | 179.69 |
| O90-H86   | 0.98584 | O90H86...O71   | 1.7772 | O90H86O71   | 176.76 |
| O64-H73   | 1.00456 | O64H73...O84   | 1.6484 | O64H73O84   | 177.73 |
| O55-H48   | 0.98922 | O55H48...O40   | 1.7526 | O55H48O40   | 178.53 |
| O33-H35   | 1.00239 | O33H35...O41   | 1.6578 | O33H35O41   | 178.79 |
| O72-H67   | 0.98822 | O72H67...O53   | 1.7639 | O72H67O53   | 177.88 |

## CAGE-2:

|         |         |              |        |           |        |
|---------|---------|--------------|--------|-----------|--------|
| O65-H59 | 1.01623 | O65H59...O42 | 1.5936 | O65H59O42 | 179    |
| O42-H38 | 0.98354 | O42H38...O34 | 1.8023 | O42H38O34 | 176.66 |
| O16-H20 | 0.97824 | O16H20...O34 | 1.872  | O16H20O34 | 177.19 |
| O15-H14 | 1.02458 | O15H14...O16 | 1.5597 | O15H14O16 | 179.93 |
| O5-H7   | 0.98239 | O5H7...O15   | 1.8167 | O5H7O15   | 176.76 |

|         |         |              |        |           |        |
|---------|---------|--------------|--------|-----------|--------|
| O5-H9   | 0.98104 | O5H9...O21   | 1.8286 | O5H9O21   | 175.68 |
| O27-H25 | 0.9786  | O27H25...O21 | 1.8507 | O27H25O21 | 178.09 |
| O50-H43 | 1.02647 | O50H43...O27 | 1.5507 | O50H43O27 | 179.17 |
| O51-H52 | 0.98515 | O51H52...O50 | 1.7898 | O51H52O50 | 177.21 |
| O51-H58 | 0.98202 | O51H58...O65 | 1.8161 | O51H58O65 | 176.73 |

|         |         |              |        |           |        |
|---------|---------|--------------|--------|-----------|--------|
| O22-H24 | 0.99617 | O22H24...O28 | 1.6966 | O22H24O28 | 174.88 |
| O6-H10  | 0.97537 | O6H10...O22  | 1.9112 | O6H10O22  | 178.67 |
| O6-H4   | 0.98124 | O6H4...O2    | 1.8274 | O6H4O2    | 177.14 |
| O13-H8  | 0.98103 | O13H8...O2   | 1.8334 | O13H8O2   | 177.7  |
| O13-H17 | 0.97643 | O13H17...O28 | 1.8904 | O13H17O28 | 178.61 |

INTERLAYERED:

|         |         |              |        |           |        |
|---------|---------|--------------|--------|-----------|--------|
| O71-H70 | 0.98608 | O71H70...O65 | 1.7657 | O71H70O65 | 177.82 |
| O64-H61 | 0.98821 | O64H61...O50 | 1.7534 | O64H61O50 | 175.33 |
| O21-H29 | 1.00388 | O21H29...O40 | 1.6472 | O21H29O40 | 178.81 |
| O33-H30 | 0.98979 | O33H30...O15 | 1.7372 | O33H30O15 | 177.81 |
| O34-H39 | 1.00548 | O34H39...O53 | 1.6435 | O34H39O53 | 179.08 |

|         |         |              |        |           |        |
|---------|---------|--------------|--------|-----------|--------|
| O28-H31 | 1.01963 | O28H31...O51 | 1.5766 | O28H31O51 | 179.89 |
| O27-H23 | 0.99615 | O27H23...O13 | 1.7138 | O27H23O13 | 176.93 |
| O2-H3   | 1.0109  | O2H3...O5    | 1.6177 | O2H3O5    | 179.55 |
| O16-H12 | 0.99614 | O16H12...O6  | 1.7151 | O16H12O6  | 178.38 |
| O42-H32 | 0.98197 | O42H32...O22 | 1.8127 | O42H32O22 | 177.73 |

FDD-2

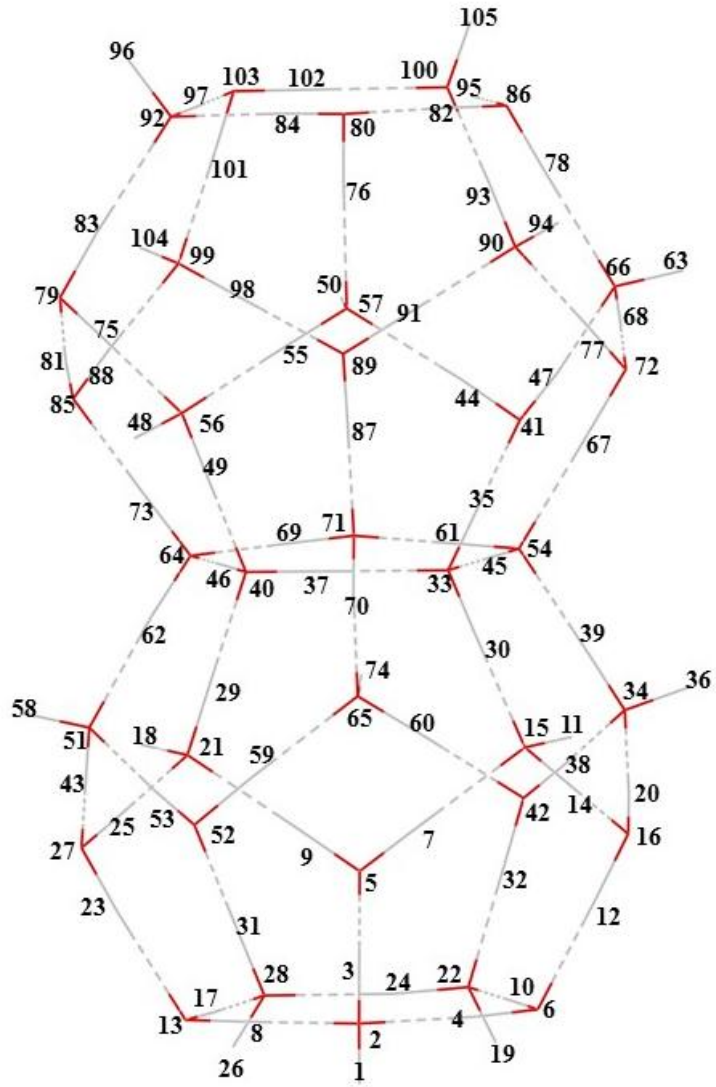

## Cage1

|           |         |                 |         |              |         |
|-----------|---------|-----------------|---------|--------------|---------|
| O100-H95  | 1.03385 | O100H95...O86   | 1.52307 | O100H95O86   | 178.607 |
| O86-H82   | 0.99697 | O86H82...O80    | 1.70631 | O86H82O80    | 177.611 |
| O80-H84   | 0.98157 | O80H84...O92    | 1.82689 | O80H84O92    | 177.837 |
| O92-H97   | 1.01138 | O92H97...O103   | 1.61439 | O92H97O103   | 179.269 |
| O103-H102 | 0.98053 | O103H102...O100 | 1.83422 | O103H102O100 | 178.638 |

|         |         |              |         |           |         |
|---------|---------|--------------|---------|-----------|---------|
| O99-H98 | 1.01131 | O99H98...O89 | 1.61726 | O99H98O89 | 179.771 |
| O89-H91 | 0.97841 | O89H91...O90 | 1.86308 | O89H91O90 | 176.89  |
| O72-H77 | 0.97954 | O72H77...O90 | 1.84922 | O72H77O90 | 179.254 |
| O66-H68 | 1.01306 | O66H68...O72 | 1.60915 | O66H68O72 | 178.775 |
| O41-H47 | 0.98342 | O41H47...O66 | 1.8086  | O41H47O66 | 175.606 |
| O41-H44 | 0.97848 | O41H44...O57 | 1.85777 | O41H44O57 | 175.029 |
| O57-H55 | 0.99153 | O57H55...O56 | 1.73096 | O57H55O56 | 174.868 |
| O79-H75 | 0.97426 | O79H75...O56 | 1.92254 | O79H75O56 | 179.44  |
| O85-H81 | 0.99214 | O85H81...O79 | 1.74852 | O85H81O79 | 176.622 |
| O85-H88 | 0.97929 | O85H88...O99 | 1.85602 | O85H88O99 | 177.182 |

|         |         |              |         |           |         |
|---------|---------|--------------|---------|-----------|---------|
| O71-H69 | 0.99617 | O71H69...O64 | 1.70256 | O71H69O64 | 177.031 |
| O40-H46 | 1.00506 | O40H46...O64 | 1.64957 | O40H46O64 | 178.56  |
| O54-H45 | 0.99463 | O54H45...O33 | 1.70712 | O54H45O33 | 179.192 |
| O54-H61 | 0.99587 | O54H61...O71 | 1.69721 | O54H61O71 | 179.275 |
| O40-H37 | 1.00182 | O40H37...O33 | 1.66422 | O40H37O33 | 179.446 |

## INTERLAYERED:

|           |         |                |         |             |         |
|-----------|---------|----------------|---------|-------------|---------|
| O103-H101 | 0.98404 | O103H101...O99 | 1.79691 | O103H101O99 | 177.498 |
| O90-H93   | 0.99903 | O90H93...O100  | 1.6794  | O90H93O100  | 175.673 |
| O86-H78   | 0.98144 | O86H78...O66   | 1.82766 | O86H78O66   | 178.778 |
| O80-H76   | 0.97529 | O80H76...O57   | 1.90698 | O80H76O57   | 178.318 |
| O79-H83   | 0.98094 | O79H83...O92   | 1.8333  | O79H83O92   | 176.097 |

|         |         |              |         |           |         |
|---------|---------|--------------|---------|-----------|---------|
| O64-H73 | 1.01556 | O64H73...O85 | 1.59596 | O64H73O85 | 179.322 |
| O56-H49 | 1.00792 | O56H49...O40 | 1.63132 | O56H49O40 | 179.475 |
| O33-H35 | 1.00576 | O33H35...O41 | 1.64201 | O33H35O41 | 179.136 |
| O72-H67 | 0.987   | O72H67...O54 | 1.77174 | O72H67O54 | 178.032 |
| O89-H87 | 0.98719 | O89H87...O71 | 1.76633 | O89H87O71 | 177.563 |

## CAGE2:

|         |         |              |         |           |         |
|---------|---------|--------------|---------|-----------|---------|
| O27-H25 | 0.97825 | O27H25...O21 | 1.86076 | O27H25O21 | 179.034 |
| O51-H43 | 1.02412 | O51H43...O27 | 1.55955 | O51H43O27 | 178.716 |
| O52-H53 | 0.98515 | O52H53...O51 | 1.78919 | O52H53O51 | 176.491 |
| O52-H59 | 0.98216 | O52H59...O65 | 1.81267 | O52H59O65 | 176.831 |
| O65-H60 | 1.0165  | O65H60...O42 | 1.59189 | O65H60O42 | 179.018 |
| O42-H38 | 0.98346 | O42H38...O34 | 1.80177 | O42H38O34 | 176.382 |

|         |         |              |         |           |         |
|---------|---------|--------------|---------|-----------|---------|
| O16-H20 | 0.97824 | O16H20...O34 | 1.86431 | O16H20O34 | 177.039 |
| O15-H14 | 1.02553 | O15H14...O16 | 1.5529  | O15H14O16 | 179.66  |
| O5-H7   | 0.98297 | O5H7...O15   | 1.8088  | O5H7O15   | 176.74  |
| O5-H9   | 0.97926 | O5H9...O21   | 1.84278 | O5H9O21   | 175.987 |

|         |         |              |         |           |         |
|---------|---------|--------------|---------|-----------|---------|
| O13-H17 | 0.97698 | O13H17...O28 | 1.88577 | O13H17O28 | 178.266 |
| O13-H8  | 0.98069 | O13H8...O2   | 1.83778 | O13H8O2   | 177.814 |
| O22-H24 | 0.99614 | O22H24...O28 | 1.69693 | O22H24O28 | 174.91  |
| O6-H10  | 0.97539 | O6H10...O22  | 1.90945 | O6H10O22  | 178.76  |
| O6-H4   | 0.98103 | O6H4...O2    | 1.82891 | O6H4O2    | 177.044 |

INTERLAYERED:

|         |         |              |         |           |         |
|---------|---------|--------------|---------|-----------|---------|
| O64-H62 | 0.98807 | O64H62...O51 | 1.76366 | O64H62O51 | 176.33  |
| O71-H70 | 0.9864  | O71H70...O65 | 1.76331 | O71H70O65 | 177.504 |
| O34-H39 | 1.00517 | O34H39...O54 | 1.64113 | O34H39O54 | 179.162 |
| O33-H30 | 0.99047 | O33H30...O15 | 1.73525 | O33H30O15 | 177.502 |
| O21-H29 | 1.0002  | O21H29...O40 | 1.67657 | O21H29O40 | 178.246 |

|         |         |              |         |           |         |
|---------|---------|--------------|---------|-----------|---------|
| O27-H23 | 0.99666 | O27H23...O13 | 1.71132 | O27H23O13 | 177.019 |
| O28-H31 | 1.02028 | O28H31...O52 | 1.57508 | O28H31O52 | 179.735 |
| O42-H32 | 0.98199 | O42H32...O22 | 1.81298 | O42H32O22 | 177.527 |
| O16-H12 | 0.99582 | O16H12...O6  | 1.714   | O16H12O6  | 178.39  |
| O2-H3   | 1.0092  | O2H3...O5    | 1.62364 | O2H3O5    | 179.995 |
